# Supplementary material for: Effects of Cardiovascular Disease Risk Factors, Musculoskeletal Health, and Physical Fitness on Occupational Performance in Firefighters—A Systematic Review and Meta-Analysis
Source: MDPI journal article supplement (doi:10.3390/ijerph191911946), 2022-09-21
Supplement: s1 [file s1]

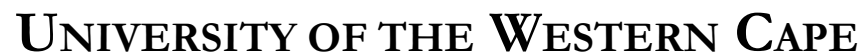

*Tel: +27 21-959 2653, Fax: 27 21-959 3686,*

## DATA EXTRACTION SHEETS

[illegible]

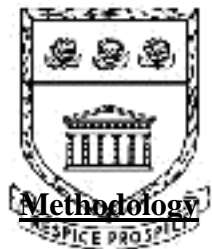

## UNIVERSITY OF THE WESTERN CAPE

Private Bag X 17, Bellville 7535, South Africa

*Tel: +27 21-959 2653, Fax: 27 21-959 3686,*

E-mail: [lleach@uwc.ac.za](mailto:lleach@uwc.ac.za)

[illegible]

[illegible]
