# Supplementary material for: Effects of Cardiovascular Disease Risk Factors, Musculoskeletal Health, and Physical Fitness on Occupational Performance in Firefighters—A Systematic Review and Meta-Analysis
Source: MDPI journal article supplement (doi:10.3390/ijerph191911946), 2022-09-21
Supplement: s1 [file s1]

## Appendix 2

| General information |  |
|---------------------|--|
| Title               |  |
| Author              |  |
| Study type          |  |
| Exposure assessed   |  |
| Outcome relevance   |  |
| Notes:              |  |

| Study eligibility         |                          |    |         |
|---------------------------|--------------------------|----|---------|
| Study characteristics     | Eligibility criteria met |    |         |
|                           | Yes                      | No | Unclear |
| Type of Study             |                          |    |         |
| Type of participants      |                          |    |         |
| Type of exposure          |                          |    |         |
| Type of comparison        |                          |    |         |
| Types of outcome measures |                          |    |         |

| INCLUDE                      | EXCLUDE |
|------------------------------|---------|
| <b>Reason for exclusion:</b> |         |
